# Supplementary material
Source: PubMed Central journal article supplement (PMC1955746)
Supplement: hesr0042-0265-s1.pdf [file hesr0042-0265-s1.pdf]

Appendix: Means and standard errors of independent variables used in logistic and multinomial regression analysis.

|                                                       | Uninsured with a regular source of care |      | Uninsured with no regular source of care |      |
|-------------------------------------------------------|-----------------------------------------|------|------------------------------------------|------|
|                                                       | Mean                                    | S.E. | Mean                                     | S.E. |
| Sample (n)                                            | 3,047                                   |      | 1,665                                    |      |
| Weighted population (in thousands)                    | 23,050                                  |      | 13,517                                   |      |
| CHC grant revenue per poor person within 5 miles      | 3.90                                    | 0.4  | 3.26                                     | 0.4  |
| County is CAP grant recipient (%)                     | 27.1                                    | 5.9  | 33.3                                     | 9.4  |
| Physician charity care hours per uninsured in site    | 6.59                                    | 0.4  | 6.54                                     | 0.5  |
| Number of safety net hospitals within 10 miles        | 1.65                                    | 0.2  | 1.83                                     | 0.2  |
| Age 0-17 (%)                                          | 17.3                                    | 1.2  | 10.8                                     | 1.6  |
| Age 18-34 (%)                                         | 38.9                                    | 1.8  | 48.6                                     | 2.0  |
| Age 45-64 (%)                                         | 23.3                                    | 1.5  | 20.4                                     | 1.5  |
| Male (%)                                              | 49.7                                    | 1.1  | 60.9                                     | 2.4  |
| Black (%)                                             | 15.9                                    | 2.1  | 11.0                                     | 2.4  |
| Hispanic citizen (%)                                  | 10.7                                    | 1.7  | 12.5                                     | 1.6  |
| Hispanic non-citizen (%)                              | 14.7                                    | 1.9  | 30.7                                     | 5.2  |
| Other race/ethnicity (%)                              | 5.2                                     | 0.8  | 6.7                                      | 1.3  |
| Family income 100-199% FPL (%)                        | 32.6                                    | 1.9  | 34.7                                     | 2.9  |
| Family income 200-299% FPL (%)                        | 18.4                                    | 1.4  | 13.4                                     | 1.6  |
| Family income 300-399% FPL (%)                        | 8.8                                     | 1.0  | 8.9                                      | 1.4  |
| Family income 400% FPL or greater (%)                 | 13.6                                    | 1.4  | 15.1                                     | 1.6  |
| Single person family (%)                              | 30.1                                    | 1.4  | 40.7                                     | 2.2  |
| Married couple, no children (%)                       | 14.5                                    | 1.4  | 14.5                                     | 1.9  |
| Single-parent family (%)                              | 16.3                                    | 1.4  | 12.2                                     | 2.1  |
| Person in poor health (%)                             | 19.3                                    | 1.2  | 21.7                                     | 1.7  |
| Other person in family in poor health (%)             | 26.7                                    | 2.3  | 27.8                                     | 3.4  |
| Person has 1 chronic condition (%)                    | 16.7                                    | 1.0  | 13.3                                     | 1.4  |
| Person has 2+ chronic conditions (%)                  | 10.8                                    | 0.7  | 4.2                                      | 0.6  |
| Other person in family with 1 chronic condition (%)   | 19.9                                    | 2.2  | 14.4                                     | 1.9  |
| Other person in family with 2+ chronic conditions (%) | 16.0                                    | 1.7  | 10.1                                     | 1.5  |
| Education (in years)                                  | 12.0                                    | 0.1  | 11.5                                     | 0.1  |
| Number of persons in family                           | 2.76                                    | 0.1  | 2.36                                     | 0.1  |
| Likely to see doctor (%)                              | 33.1                                    | 1.6  | 30.6                                     | 1.6  |
| % of persons in zip code below poverty                | 14.3                                    | 0.7  | 14.9                                     | 0.9  |
